# Supplementary material
Source: Royal Society of Chemistry journal article supplement (doi:10.1039/d6fb00064a)
Supplement: d6fb00064a1.pdf [file d6fb00064a1.pdf]

## ELECTRONIC SUPPORTING INFORMATION

### **Modified QuEChERS-LC-MS/MS for the Simultaneous Detection of Eight Prohibited Dyes in Complex Food Matrices: Method Validation and Application to Real Samples**

Van-Binh Phung<sup>a</sup>, Thi-Son Tra Nguyen<sup>a</sup>, Van-Cuong Nguyen<sup>a</sup>, Quang-Hieu Tran<sup>a\*</sup>

<sup>a</sup>Faculty of Chemical Engineering, Industrial University of Ho Chi Minh City, 12 Nguyen Van Bao, Hanh Thong Ward, Ho Chi Minh City 700000, Vietnam

\*Corresponding author: [tranquanghieu@iuh.edu.vn](mailto:tranquanghieu@iuh.edu.vn)

#### **Table of Content**

**Table S1.** Effect of extraction solvent for recover

**Table S2.** Effect of extraction salt for recovery

**Table S3.** Effect of cleaning up mixture for recovery

**Table S4.** System suitability

**Table S5.** Selectivity for chili sauce.

**Table S6.** Matrix effect (ME%) values for the eight target dyes in six representative food matrices

**Table S7.** Detailed recovery (%) and precision data for target analytes at three different fortification levels in all studied matrices

**Table S8.** Proficiency testing results for Auramine O analysis

**Table S1.** System suitability

| <b>Analytes</b> | <b>Sample</b> | <b>Time retention</b> | <b>Mean (min)</b> | <b>Peak area</b> | <b>Mean</b> | <b>RSD<sub>t</sub> (%)</b> | <b>RSD<sub>a</sub> (%)</b> |
|-----------------|---------------|-----------------------|-------------------|------------------|-------------|----------------------------|----------------------------|
| Auramine O      | S3-1          | 1.59                  | 1.59              | 106450           | 106070      | 0.00                       | 1.66                       |
|                 | S3-2          | 1.59                  |                   | 104358           |             |                            |                            |
|                 | S3-3          | 1.59                  |                   | 108735           |             |                            |                            |
|                 | S3-4          | 1.59                  |                   | 104825           |             |                            |                            |
|                 | S3-5          | 1.59                  |                   | 107384           |             |                            |                            |
|                 | S3-6          | 1.59                  |                   | 104665           |             |                            |                            |
| Rhodamine B     | S3-1          | 1.85                  | 1.85              | 128251           | 126406      | 0.00                       | 1.48                       |
|                 | S3-2          | 1.85                  |                   | 124559           |             |                            |                            |
|                 | S3-3          | 1.85                  |                   | 126204           |             |                            |                            |
|                 | S3-4          | 1.85                  |                   | 124357           |             |                            |                            |
|                 | S3-5          | 1.85                  |                   | 128936           |             |                            |                            |
|                 | S3-6          | 1.85                  |                   | 126126           |             |                            |                            |
| Chrysoidine G   | S3-1          | 1.38                  | 1.38              | 57093            | 57065       | 0.30                       | 1.11                       |
|                 | S3-2          | 1.38                  |                   | 56028            |             |                            |                            |
|                 | S3-3          | 1.38                  |                   | 56765            |             |                            |                            |
|                 | S3-4          | 1.38                  |                   | 57911            |             |                            |                            |
|                 | S3-5          | 1.39                  |                   | 57397            |             |                            |                            |
|                 | S3-6          | 1.38                  |                   | 57193            |             |                            |                            |
| Methylene blue  | S3-1          | 1.43                  | 1.42              | 56955            | 56770       | 0.36                       | 1.52                       |
|                 | S3-2          | 1.42                  |                   | 55337            |             |                            |                            |
|                 | S3-3          | 1.42                  |                   | 56421            |             |                            |                            |
|                 | S3-4          | 1.42                  |                   | 57523            |             |                            |                            |
|                 | S3-5          | 1.43                  |                   | 57746            |             |                            |                            |
|                 | S3-6          | 1.42                  |                   | 56638            |             |                            |                            |
| Brilliant green | S3-1          | 2.00                  | 2.00              | 57964            | 56927       | 0.26                       | 1.75                       |
|                 | S3-2          | 2.01                  |                   | 56555            |             |                            |                            |
|                 | S3-3          | 2.00                  |                   | 57995            |             |                            |                            |
|                 | S3-4          | 2.00                  |                   | 56222            |             |                            |                            |
|                 | S3-5          | 2.01                  |                   | 57295            |             |                            |                            |
|                 | S3-6          | 2.00                  |                   | 55531            |             |                            |                            |
| Sudan yellow    | S3-1          | 2.59                  | 2.59              | 611193           | 610403      | 0.16                       | 0.81                       |
|                 | S3-2          | 2.59                  |                   | 602164           |             |                            |                            |
|                 | S3-3          | 2.59                  |                   | 616779           |             |                            |                            |
|                 | S3-4          | 2.59                  |                   | 608857           |             |                            |                            |

|               |      |      |      |        |        |      |      |
|---------------|------|------|------|--------|--------|------|------|
|               | S3-5 | 2.60 |      | 613798 |        |      |      |
|               | S3-6 | 2.59 |      | 609629 |        |      |      |
| Toluidine red | S3-1 | 2.70 | 2.70 | 422913 | 422406 | 0.15 | 1.70 |
|               | S3-2 | 2.70 |      | 417985 |        |      |      |
|               | S3-3 | 2.70 |      | 427012 |        |      |      |
|               | S3-4 | 2.70 |      | 417457 |        |      |      |
|               | S3-5 | 2.71 |      | 434142 |        |      |      |
|               | S3-6 | 2.70 |      | 414926 |        |      |      |
| Sudan red G   | S3-1 | 2.72 | 2.72 | 151358 | 150720 | 0.00 | 1.75 |
|               | S3-2 | 2.72 |      | 147921 |        |      |      |
|               | S3-3 | 2.72 |      | 153936 |        |      |      |
|               | S3-4 | 2.72 |      | 147271 |        |      |      |
|               | S3-5 | 2.72 |      | 152712 |        |      |      |
|               | S3-6 | 2.72 |      | 151120 |        |      |      |

**Table S2.** Selectivity for chili sauce

| Analytes        | Sample   | t <sub>R</sub> | Peak area |
|-----------------|----------|----------------|-----------|
| Auramine O      | M1       | -              | -         |
|                 | M1+2LOQ  | 1.59           | 43931     |
|                 | M1+5LOQ  | 1.59           | 104375    |
|                 | M1+10LOQ | 1.59           | 211469    |
| Rhodamine B     | M1       | -              | -         |
|                 | M1+2LOQ  | 1.85           | 53823     |
|                 | M1+5LOQ  | 1.85           | 123205    |
|                 | M1+10LOQ | 1.85           | 256119    |
| Chrysoidine G   | M1       | -              | -         |
|                 | M1+2LOQ  | 1.38           | 22963     |
|                 | M1+5LOQ  | 1.38           | 55455     |
|                 | M1+10LOQ | 1.38           | 110362    |
| Methylene blue  | M1       | -              | -         |
|                 | M1+2LOQ  | 1.42           | 22662     |
|                 | M1+5LOQ  | 1.42           | 54472     |
|                 | M1+10LOQ | 1.42           | 114570    |
| Brilliant green | M1       | -              | -         |
|                 | M1+2LOQ  | 2              | 23066     |
|                 | M1+5LOQ  | 2              | 52970     |
|                 | M1+10LOQ | 2.01           | 111385    |
| Sudan yellow    | M1       | -              | -         |
|                 | M1+2LOQ  | 2.59           | 220995    |
|                 | M1+5LOQ  | 2.59           | 541161    |
|                 | M1+10LOQ | 2.59           | 1084127   |
| Toluidine red   | M1       | -              | -         |
|                 | M1+2LOQ  | 2.7            | 170825    |
|                 | M1+5LOQ  | 2.69           | 397587    |
|                 | M1+10LOQ | 2.7            | 724450    |
| Sudan red G     | M1       | -              | -         |
|                 | M1+2LOQ  | 2.72           | 60211     |
|                 | M1+5LOQ  | 2.72           | 139179    |
|                 | M1+10LOQ | 2.72           | 246683    |

**Table S3.** Effect of extraction solvent for recovery

| Solvents          | Auramine O | Rhodamine B | Chrysoidine G | Methylene blue | Brilliant green | Sudan yellow | Toluidine red | Sudan red G |
|-------------------|------------|-------------|---------------|----------------|-----------------|--------------|---------------|-------------|
| ACN               | 48.8       | 48.4        | 46.8          | 58.3           | 32.2            | 37.9         | 24.4          | 39.2        |
| M1-1              | 53.6       | 52.1        | 51.9          | 62.6           | 38.1            | 45.4         | 31.5          | 49.8        |
| M1-2              | 44.4       | 44.6        | 38.3          | 55.5           | 26.8            | 31.2         | 16.8          | 28.6        |
| M1-3              | 48.3       | 48.5        | 50.2          | 56.8           | 31.8            | 37.0         | 24.8          | 39.2        |
| MeOH              | 81.7       | 76.1        | 30.8          | 79.9           | 69.3            | 72.8         | 12.3          | 63.6        |
| M1-1              | 85.4       | 75.7        | 30.1          | 80.4           | 68.8            | 72.8         | 12.5          | 61.7        |
| M1-2              | 81.5       | 76.4        | 30.5          | 81.0           | 70.5            | 73.0         | 12.5          | 62.0        |
| M1-3              | 78.3       | 76.3        | 31.7          | 78.4           | 68.5            | 72.5         | 12.0          | 67.0        |
| ACN:MeOH =<br>1:1 | 68.6       | 69.8        | 26.8          | 76.1           | 65.8            | 70.3         | 37.8          | 78.9        |
| M1-1              | 69.8       | 70.2        | 27.5          | 78.1           | 65.3            | 71.2         | 38.0          | 79.4        |
| M1-2              | 68.9       | 69.2        | 25.2          | 78.0           | 66.9            | 69.0         | 38.5          | 77.6        |
| M1-3              | 67.2       | 69.9        | 27.5          | 72.3           | 65.0            | 70.6         | 36.9          | 79.6        |
| ACN:MeOH =<br>4:1 | 86.7       | 79.4        | 68.7          | 80.7           | 70.3            | 82.4         | 64.7          | 95.7        |
| M1-1              | 87.6       | 78.7        | 71.5          | 82.0           | 68.2            | 81.9         | 62.4          | 94.3        |
| M1-2              | 87.2       | 78.6        | 68.7          | 81.0           | 69.8            | 82.1         | 64.1          | 94.4        |
| M1-3              | 85.3       | 80.9        | 66.0          | 79.0           | 72.8            | 83.1         | 67.7          | 98.3        |

**Table S4.** Effect of extraction salt for recovery

| Salts                                                                            | Auramine<br>O | Rhodamine<br>B | Chrysoidine<br>G | Methylene<br>blue | Brilliant<br>green | Sudan<br>yellow | Toluidine<br>red | Sudan red<br>G |
|----------------------------------------------------------------------------------|---------------|----------------|------------------|-------------------|--------------------|-----------------|------------------|----------------|
| CH <sub>3</sub> COONa.3H <sub>2</sub> O:Na <sub>2</sub> SO <sub>4</sub><br>= 1:4 | 52.6          | 36.3           | 23.2             | 62.7              | 49.5               | 40.2            | 22.8             | 27.0           |
| M1-1                                                                             | 59.7          | 38.6           | 24.4             | 64.1              | 52.6               | 43.4            | 23.8             | 28.4           |
| M1-2                                                                             | 55.4          | 39.0           | 24.4             | 67.0              | 49.5               | 41.0            | 24.2             | 27.7           |
| M1-3                                                                             | 42.7          | 31.4           | 20.9             | 57.1              | 46.4               | 36.1            | 20.3             | 24.9           |
| CH <sub>3</sub> COONa.3H <sub>2</sub> O:MgSO <sub>4</sub><br>= 1:4               | 89.5          | 94.1           | 74.0             | 85.9              | 96.6               | 80.6            | 80.2             | 73.5           |
| M1-1                                                                             | 88.7          | 95.6           | 75.5             | 87.8              | 95.9               | 79.2            | 65.3             | 65.6           |
| M1-2                                                                             | 90.3          | 92.9           | 75.6             | 85.2              | 95.0               | 81.1            | 82.8             | 73.5           |
| M1-3                                                                             | 89.6          | 93.7           | 71.0             | 84.8              | 98.9               | 81.7            | 92.6             | 81.6           |
| NaCl:Na <sub>2</sub> SO <sub>4</sub><br>= 1:4                                    | 91.1          | 77.4           | 55.4             | 77.8              | 69.0               | 85.3            | 79.9             | 73.1           |
| M1-1                                                                             | 91.3          | 76.9           | 48.9             | 77.7              | 69.8               | 83.3            | 78.5             | 71.9           |
| M1-2                                                                             | 88.0          | 77.0           | 55.3             | 74.7              | 68.2               | 85.2            | 80.3             | 73.6           |
| M1-3                                                                             | 94.1          | 78.3           | 61.9             | 81.0              | 69.0               | 87.2            | 81.0             | 73.9           |
| NaCl:MgSO <sub>4</sub><br>= 1:4                                                  | 76.5          | 63.9           | 78.9             | 73.4              | 78.3               | 68.5            | 68.1             | 60.4           |
| M1-1                                                                             | 77.9          | 64.2           | 75.1             | 71.7              | 75.8               | 69.4            | 68.9             | 61.5           |
| M1-2                                                                             | 75.3          | 63.7           | 79.1             | 72.0              | 77.7               | 68.9            | 69.3             | 60.6           |
| M1-3                                                                             | 76.3          | 63.7           | 82.6             | 76.4              | 81.2               | 67.3            | 66.0             | 59.0           |

**Table S5.** Effect of clean up mixture for recovery

| Kit d-SPE                                                 | Auramine O | Rhodamine B | Chrysoidine G | Methylene blue | Brilliant green | Sudan yellow | Toluidine red | Sudan red G |
|-----------------------------------------------------------|------------|-------------|---------------|----------------|-----------------|--------------|---------------|-------------|
| PSA:C18:Na <sub>2</sub> SO <sub>4</sub><br>= 100:100:1000 | 95.0       | 81.9        | 82.9          | 98.2           | 85.9            | 80.7         | 63.3          | 73.0        |
| M1-1                                                      | 94.5       | 81.2        | 83.2          | 98.5           | 85.9            | 80.7         | 60.7          | 72.0        |
| M1-2                                                      | 96.1       | 82.3        | 84.1          | 97.5           | 85.9            | 80.3         | 64.3          | 75.9        |
| M1-3                                                      | 94.4       | 82.3        | 81.2          | 98.6           | 85.8            | 81.0         | 64.9          | 71.0        |
| PSA:C18:Na <sub>2</sub> SO <sub>4</sub><br>= 50:50:1000   | 97.3       | 80.1        | 80.1          | 96.3           | 85.6            | 81.5         | 67.2          | 74.8        |
| M1-1                                                      | 97.4       | 79.7        | 80.1          | 95.8           | 87.7            | 82.2         | 67.6          | 76.0        |
| M1-2                                                      | 96.4       | 80.1        | 79.8          | 96.4           | 83.1            | 81.3         | 66.6          | 74.3        |
| M1-3                                                      | 98.1       | 80.5        | 80.5          | 96.7           | 86.0            | 81.1         | 67.6          | 74.0        |
| PSA:C18:MgSO <sub>4</sub><br>= 100:100:1000               | 98.4       | 98.4        | 98.3          | 92.2           | 94.6            | 96.2         | 95.3          | 96.3        |
| M1-1                                                      | 98.5       | 101.6       | 100.8         | 92.9           | 96.1            | 95.7         | 95.7          | 96.1        |
| M1-2                                                      | 98.9       | 97.4        | 98.6          | 92.7           | 93.0            | 96.2         | 94.8          | 98.3        |
| M1-3                                                      | 97.8       | 96.1        | 95.5          | 90.9           | 94.7            | 96.8         | 95.4          | 94.5        |
| PSA:C18:MgSO <sub>4</sub><br>= 50:50:1000                 | 97.2       | 97.7        | 98.3          | 87.8           | 95.3            | 94.1         | 78.6          | 87.9        |
| M1-1                                                      | 96.0       | 96.9        | 100.8         | 88.0           | 93.5            | 94.1         | 76.4          | 88.4        |
| M1-2                                                      | 97.1       | 98.2        | 98.6          | 87.5           | 94.9            | 94.4         | 79.3          | 88.5        |
| M1-3                                                      | 98.5       | 98.1        | 95.5          | 87.9           | 97.5            | 93.8         | 80.0          | 86.6        |

**Table S6.** Matrix effect (ME%) values for the eight target dyes in six representative food matrices

$$\%ME = \left( \frac{\text{slope}_{\text{matrix}}}{\text{slope}_{\text{solvent}}} - 1 \right) \times 100$$

| <b>M1</b>      |                      | <b>Auramine O</b> | <b>Rhodamine B</b> | <b>Chrysoidine G</b> | <b>Methylene blue</b> | <b>Brilliant green</b> | <b>Sudan yellow</b> | <b>Toluidine red</b> | <b>Sudan red G</b> |
|----------------|----------------------|-------------------|--------------------|----------------------|-----------------------|------------------------|---------------------|----------------------|--------------------|
| <b>Matrix</b>  | Calibration equation | y = 17080x + 2128 | y = 19073x + 3874  | y = 9268x + 989      | y = 9649x + 1809      | y = 8883x + 1907       | y = 102048x + 6735  | y = 6041x + 4591     | y = 1548x + 3712   |
|                | <i>Slope</i>         | 17080             | 19073              | 9268                 | 9649                  | 8883                   | 102048              | 6041                 | 1548               |
| <b>Solvent</b> | Calibration equation | y = 18169x - 472  | y = 22037x + 598   | y = 11026x + 321     | y = 11019x + 874      | y = 11276x - 193       | y = 118095x - 2232  | y = 7194x + 346      | y = 1787x + 457    |
|                | <i>Slope</i>         | 18169             | 22037              | 11026                | 11019                 | 11276                  | 118095              | 7194                 | 1787               |
| <b>%ME</b>     |                      | <b>-6,0</b>       | <b>-13,5</b>       | <b>-15,9</b>         | <b>-12,4</b>          | <b>-21,2</b>           | <b>-13,6</b>        | <b>-16,0</b>         | <b>-13,4</b>       |
| <b>M2</b>      |                      | <b>Auramine O</b> | <b>Rhodamine B</b> | <b>Chrysoidine G</b> | <b>Methylene blue</b> | <b>Brilliant green</b> | <b>Sudan yellow</b> | <b>Toluidine red</b> | <b>Sudan red G</b> |
| <b>Matrix</b>  | Calibration equation | y = 15945x + 2903 | y = 17923x + 5362  | y = 9337x + 528      | y = 8889x + 1572      | y = 10637x + 2293      | y = 109700x + 4840  | y = 5904x + 4227     | y = 1518x + 4042   |
|                | <i>Slope</i>         | 15945             | 17923              | 9337                 | 8889                  | 10637                  | 109700              | 5904                 | 1518               |
| <b>Solvent</b> | Calibration equation | y = 18169x - 472  | y = 22037x + 598   | y = 11026x + 321     | y = 11019x + 874      | y = 11276x - 193       | y = 118095x - 2232  | y = 7194x + 346      | y = 1787x + 457    |
|                | <i>Slope</i>         | 18169             | 22037              | 11026                | 11019                 | 11276                  | 118095              | 7194                 | 1787               |
| <b>%ME</b>     |                      | <b>-12,2</b>      | <b>-18,7</b>       | <b>-15,3</b>         | <b>-19,3</b>          | <b>-5,7</b>            | <b>-7,1</b>         | <b>-17,9</b>         | <b>-15,1</b>       |
| <b>M3</b>      |                      | <b>Auramine O</b> | <b>Rhodamine B</b> | <b>Chrysoidine G</b> | <b>Methylene blue</b> | <b>Brilliant green</b> | <b>Sudan yellow</b> | <b>Toluidine red</b> | <b>Sudan red G</b> |
| <b>Matrix</b>  | Calibration equation | y = 16143x - 1385 | y = 18410x + 1913  | y = 9022x - 482      | y = 8457x + 1913      | y = 9868x + 1535       | y = 108851x + 4260  | y = 5733x - 4206     | y = 1515x - 1594   |
|                | <i>Slope</i>         | 16143             | 18410              | 9022                 | 8457                  | 9868                   | 108851              | 5733                 | 1515               |
| <b>Solvent</b> | Calibration equation | y = 18169x - 472  | y = 22037x + 598   | y = 11026x + 321     | y = 11019x + 874      | y = 11276x - 193       | y = 118095x - 2232  | y = 7194x + 346      | y = 1787x + 457    |
|                | <i>Slope</i>         | 18169             | 22037              | 11026                | 11019                 | 11276                  | 118095              | 7194                 | 1787               |
| <b>%ME</b>     |                      | <b>-11,2</b>      | <b>-16,5</b>       | <b>-18,2</b>         | <b>-23,3</b>          | <b>-12,5</b>           | <b>-7,8</b>         | <b>-20,3</b>         | <b>-15,2</b>       |
| <b>M4</b>      |                      | <b>Auramine O</b> | <b>Rhodamine B</b> | <b>Chrysoidine G</b> | <b>Methylene blue</b> | <b>Brilliant green</b> | <b>Sudan yellow</b> | <b>Toluidine red</b> | <b>Sudan red G</b> |
| <b>Matrix</b>  | Calibration          | y = 15517x        | y = 18168x +       | y = 9400x +          | y = 9468x +           | y = 9152x +            | y = 91277x          | y = 5808x -          | y = 1628x +        |

|                |                      |                   |                    |                      |                       |                        |                     |                      |                    |
|----------------|----------------------|-------------------|--------------------|----------------------|-----------------------|------------------------|---------------------|----------------------|--------------------|
|                | equation             | + 1707            | 2530               | 356                  | 1183                  | 432                    | + 9072              | 2198                 | 1538               |
|                | <i>Slope</i>         | 15517             | 18168              | 9400                 | 9468                  | 9152                   | 91277               | 5808                 | 1628               |
| <b>Solvent</b> | Calibration equation | y = 18169x - 472  | y = 22037x + 598   | y = 11026x + 321     | y = 11019x + 874      | y = 11276x - 193       | y = 118095x - 2232  | y = 7194x + 346      | y = 1787x + 457    |
|                | <i>Slope</i>         | 18169             | 22037              | 11026                | 11019                 | 11276                  | 118095              | 7194                 | 1787               |
| <b>%ME</b>     |                      | <b>-14,6</b>      | <b>-17,6</b>       | <b>-14,7</b>         | <b>-14,1</b>          | <b>-18,8</b>           | <b>-22,7</b>        | <b>-19,3</b>         | <b>-8,9</b>        |
| <b>M5</b>      |                      | <b>Auramine O</b> | <b>Rhodamine B</b> | <b>Chrysoidine G</b> | <b>Methylene blue</b> | <b>Brilliant green</b> | <b>Sudan yellow</b> | <b>Toluidine red</b> | <b>Sudan red G</b> |
| <b>Matrix</b>  | Calibration equation | y = 14896x - 380  | y = 18048x + 1158  | y = 9172x - 942      | y = 8399x + 667       | y = 8966x + 1853       | y = 90549x - 6937   | y = 5723x - 3027     | y = 1387x - 1612   |
|                | <i>Slope</i>         | 14896             | 18048              | 9172                 | 8399                  | 8966                   | 90549               | 5723                 | 1387               |
| <b>Solvent</b> | Calibration equation | y = 18169x - 472  | y = 22037x + 598   | y = 11026x + 321     | y = 11019x + 874      | y = 11276x - 193       | y = 118095x - 2232  | y = 7194x + 346      | y = 1787x + 457    |
|                | <i>Slope</i>         | 18169             | 22037              | 11026                | 11019                 | 11276                  | 118095              | 7194                 | 1787               |
| <b>%ME</b>     |                      | <b>-18,0</b>      | <b>-18,1</b>       | <b>-16,8</b>         | <b>-23,8</b>          | <b>-20,5</b>           | <b>-23,3</b>        | <b>-20,4</b>         | <b>-22,4</b>       |
| <b>M6</b>      |                      | <b>Auramine O</b> | <b>Rhodamine B</b> | <b>Chrysoidine G</b> | <b>Methylene blue</b> | <b>Brilliant green</b> | <b>Sudan yellow</b> | <b>Toluidine red</b> | <b>Sudan red G</b> |
| <b>Matrix</b>  | Calibration equation | y = 16347x + 1179 | y = 19042x + 2840  | y = 9415x + 849      | y = 8375x + 2292      | y = 9512x + 1563       | y = 92458x + 10847  | y = 6051x + 4972     | y = 1480x + 2511   |
|                | <i>Slope</i>         | 16347             | 19042              | 9415                 | 8375                  | 9512                   | 92458               | 6051                 | 1480               |
| <b>Solvent</b> | Calibration equation | y = 18169x - 472  | y = 22037x + 598   | y = 11026x + 321     | y = 11019x + 874      | y = 11276x - 193       | y = 118095x - 2232  | y = 7194x + 346      | y = 1787x + 457    |
|                | <i>Slope</i>         | 18169             | 22037              | 11026                | 11019                 | 11276                  | 118095              | 7194                 | 1787               |
| <b>%ME</b>     |                      | <b>-10,0</b>      | <b>-13,6</b>       | <b>-14,6</b>         | <b>-24,0</b>          | <b>-15,6</b>           | <b>-21,7</b>        | <b>-15,9</b>         | <b>-17,2</b>       |

**Table S7.** Detailed recovery (%) and precision data for target analytes at three different fortification levels in all studied matrices

**M1**

| <b>Fortification levels</b> | <b>Auramine O</b> | <b>Rhodamine B</b> | <b>Chrysoidine G</b> | <b>Methylene blue</b> | <b>Brilliant green</b> | <b>Sudan yellow</b> | <b>Toluidine red</b> | <b>Sudan red G</b> |
|-----------------------------|-------------------|--------------------|----------------------|-----------------------|------------------------|---------------------|----------------------|--------------------|
| LOQ                         | 87.0 - 100.0      | 95.2 - 105.5       | 95.4 - 106.5         | 92.9 - 98.3           | 84.6 - 110.5           | 97.7 - 102.4        | 82.7 - 94.8          | 83.8 - 99.2        |
| 2LOQ                        | 97.9 - 104.2      | 95.2 - 105.1       | 93.9 - 99.8          | 89.7 - 106.1          | 95.1 - 105.4           | 90.6 - 100.7        | 95.8 - 106.0         | 97.7 - 107.0       |
| 5LOQ                        | 91.5 - 99.3       | 95.0 - 99.9        | 92.7 - 104.8         | 92.6 - 101.8          | 90.9 - 99.0            | 92.6 - 96.5         | 95.9 - 103.1         | 93.1 - 102.9       |

**M2**

| <b>Fortification levels</b> | <b>Auramine O</b> | <b>Rhodamine B</b> | <b>Chrysoidine G</b> | <b>Methylene blue</b> | <b>Brilliant green</b> | <b>Sudan yellow</b> | <b>Toluidine red</b> | <b>Sudan red G</b> |
|-----------------------------|-------------------|--------------------|----------------------|-----------------------|------------------------|---------------------|----------------------|--------------------|
| LOQ                         | 95.6 - 105.3      | 92.9 - 103.3       | 94.8 - 113.1         | 93.6 - 112.1          | 94.1 - 104.0           | 87.3 - 91.1         | 89.4 - 107.1         | 91.0 - 107.9       |
| 2LOQ                        | 89.9 - 97.5       | 90.9 - 99.5        | 93.3 - 97.5          | 90.0 - 97.9           | 88.1 - 98.1            | 89.1 - 94.8         | 92.2 - 99.9          | 91.8 - 105.0       |
| 5LOQ                        | 97.4 - 103.7      | 98.5 - 104.9       | 92.0 - 98.1          | 93.2 - 102.1          | 92.6 - 99.5            | 97.1 - 101.2        | 98.9 - 105.0         | 96.7 - 102.5       |

**M3**

| <b>Fortification levels</b> | <b>Auramine O</b> | <b>Rhodamine B</b> | <b>Chrysoidine G</b> | <b>Methylene blue</b> | <b>Brilliant green</b> | <b>Sudan yellow</b> | <b>Toluidine red</b> | <b>Sudan red G</b> |
|-----------------------------|-------------------|--------------------|----------------------|-----------------------|------------------------|---------------------|----------------------|--------------------|
| LOQ                         | 93.5 - 106.1      | 86.7 - 100.9       | 85.7 - 99.3          | 93.3 - 108.1          | 90.4 - 101.8           | 98.3 - 106.6        | 82.1 - 101.2         | 94.4 - 108.2       |
| 2LOQ                        | 87.0 - 104.7      | 90.6 - 103.0       | 89.7 - 100.3         | 95.4 - 105.3          | 96.1 - 103.8           | 87.5 - 103.3        | 85.8 - 106.2         | 87.7 - 102.3       |
| 5LOQ                        | 98.6 - 107.7      | 95.9 - 104.8       | 87.2 - 97.4          | 96.9 - 104.3          | 90.4 - 97.1            | 89.9 - 107.6        | 87.0 - 110.0         | 82.3 - 107.6       |

**M4**

| <b>Fortification levels</b> | <b>Auramine O</b> | <b>Rhodamine B</b> | <b>Chrysoidine G</b> | <b>Methylene blue</b> | <b>Brilliant green</b> | <b>Sudan yellow</b> | <b>Toluidine red</b> | <b>Sudan red G</b> |
|-----------------------------|-------------------|--------------------|----------------------|-----------------------|------------------------|---------------------|----------------------|--------------------|
| LOQ                         | 93.4 - 105.6      | 90.9 - 108.9       | 86.2 - 109.3         | 97.2 - 106.7          | 99.1 - 111.2           | 82.7 - 108.2        | 82.1 - 103.8         | 80.4 - 100.0       |
| 2LOQ                        | 97.0 - 105.5      | 97.8 - 105.3       | 90.6 - 103.0         | 98.1 - 103.3          | 97.9 - 105.2           | 85.8 - 103.7        | 84.3 - 106.1         | 81.1 - 109.1       |
| 5LOQ                        | 98.0 - 101.4      | 98.1 - 102.2       | 88.0 - 94.7          | 96.9 - 101.1          | 94.3 - 104.2           | 97.0 - 98.3         | 101.2 - 106.9        | 98.5 - 106.6       |

**M5**

| <b>Fortification levels</b> | <b>Auramine O</b> | <b>Rhodamine B</b> | <b>Chrysoidine G</b> | <b>Methylene blue</b> | <b>Brilliant green</b> | <b>Sudan yellow</b> | <b>Toluidine red</b> | <b>Sudan red G</b> |
|-----------------------------|-------------------|--------------------|----------------------|-----------------------|------------------------|---------------------|----------------------|--------------------|
| LOQ                         | 87.2 - 99.9       | 89.0 - 96.4        | 79.0 - 104.4         | 76.8 - 91.1           | 83.5 - 98.7            | 97.5 - 108.3        | 101.8 - 108.0        | 89.8 - 107.4       |
| 2LOQ                        | 89.5 - 95.3       | 91.4 - 100.9       | 89.4 - 101.7         | 85.3 - 92.1           | 88.0 - 97.2            | 89.6 - 99.1         | 91.3 - 99.1          | 86.8 - 97.7        |

|      |              |              |              |              |             |             |             |              |
|------|--------------|--------------|--------------|--------------|-------------|-------------|-------------|--------------|
| 5LOQ | 95.0 - 100.4 | 96.3 - 103.3 | 97.0 - 104.4 | 95.0 - 104.9 | 94.9 - 99.9 | 94.9 - 97.2 | 96.3 - 98.8 | 93.8 - 102.3 |
|------|--------------|--------------|--------------|--------------|-------------|-------------|-------------|--------------|

**M6**

| <i>Fortification levels</i> | <b>Auramine O</b> | <b>Rhodamine B</b> | <b>Chrysoidine G</b> | <b>Methylene blue</b> | <b>Brilliant green</b> | <b>Sudan yellow</b> | <b>Toluidine red</b> | <b>Sudan red G</b> |
|-----------------------------|-------------------|--------------------|----------------------|-----------------------|------------------------|---------------------|----------------------|--------------------|
| LOQ                         | 90.2 - 102.8      | 81.9 - 104.7       | 81.4 - 96.5          | 80.7 - 92.3           | 88.0 - 96.3            | 82.9 - 101.8        | 85.0 - 99.8          | 80.9 - 107.9       |
| 2LOQ                        | 86.3 - 108.4      | 85.7 - 108.8       | 92.7 - 106.8         | 85.1 - 105.2          | 87.1 - 107.1           | 87.9 - 106.7        | 85.9 - 107.5         | 81.4 - 108.4       |
| 5LOQ                        | 92.9 - 108.6      | 93.9 - 96.5        | 92.5 - 101.5         | 93.7 - 99.5           | 92.0 - 96.1            | 95.4 - 103.3        | 85.5 - 99.0          | 94.6 - 107.6       |

**Table S8.** Proficiency testing results for Auramine O analysis

| <b>Parameter</b>                              |                       |                | <b>Value</b>      |
|-----------------------------------------------|-----------------------|----------------|-------------------|
| Assigned value (x)                            |                       |                | 0.520             |
| Standard deviation for proficiency assessment |                       |                | 0.057             |
| Standard uncertainty of the assigned value    |                       |                | 0.034             |
| <b>Unit</b>                                   |                       |                | <b>mg/kg</b>      |
| <b>Laboratory Code</b>                        | <b>Result (mg/kg)</b> | <b>Z-score</b> | <b>Conclusion</b> |
| L-11                                          | 0.54                  | 0.35           | Satisfactory      |
